# Supplementary material for: Age and Sex Influences Gamma-aminobutyric Acid Concentrations in the Developing Brain of Very Premature Infants
Source: PubMed Central journal article supplement (PMC7324587; doi:10.1038/s41598-020-67188-y), 2020-06-29
Supplement: 41598_2020_67188_MOESM1_ESM.pdf [file 41598_2020_67188_MOESM1_ESM.pdf]

## **Age and Sex Influences Gamma-aminobutyric Acid Concentrations in the Developing Brain of Very Premature Infants**

Sudeepta K. Basu MBBS MS<sup>1,2,7</sup>, Subechhya Pradhan PhD<sup>2,7</sup>, Marni B. Jacobs PhD<sup>3,7</sup>, Mariam Said MD<sup>1,2,7</sup>, Kushal Kapse MS<sup>2</sup>, Jonathan Murnick MD<sup>4,7</sup>, Matthew T. Whitehead MD<sup>4,7</sup>, Taeun Chang MD<sup>5,7</sup>, Adre J. du Plessis MD MBChB<sup>6,7</sup>, and Catherine Limperopoulos PhD<sup>2,4,7</sup>.

<sup>1</sup>Neonatology, Children's National Hospital, Washington, D.C.

<sup>2</sup>Center for the Developing Brain, Children's National Hospital, Washington, D.C.

<sup>3</sup>Division of Biostatistics and Study Methodology, Children's National Hospital, Washington, D.C.

<sup>4</sup>Division of Diagnostic Imaging and Radiology, Children's National Hospital, Washington, D.C.

<sup>5</sup>Division of Neurology, Children's National Hospital, Washington, D.C.

<sup>6</sup>Fetal Medicine institute, Children's National Hospital, Washington, D.C.

<sup>7</sup>The George Washington University School of Medicine, Washington, D.C.

Supplementary Figure A: Composite superimposed OFF spectrum for all PRESS acquisitions

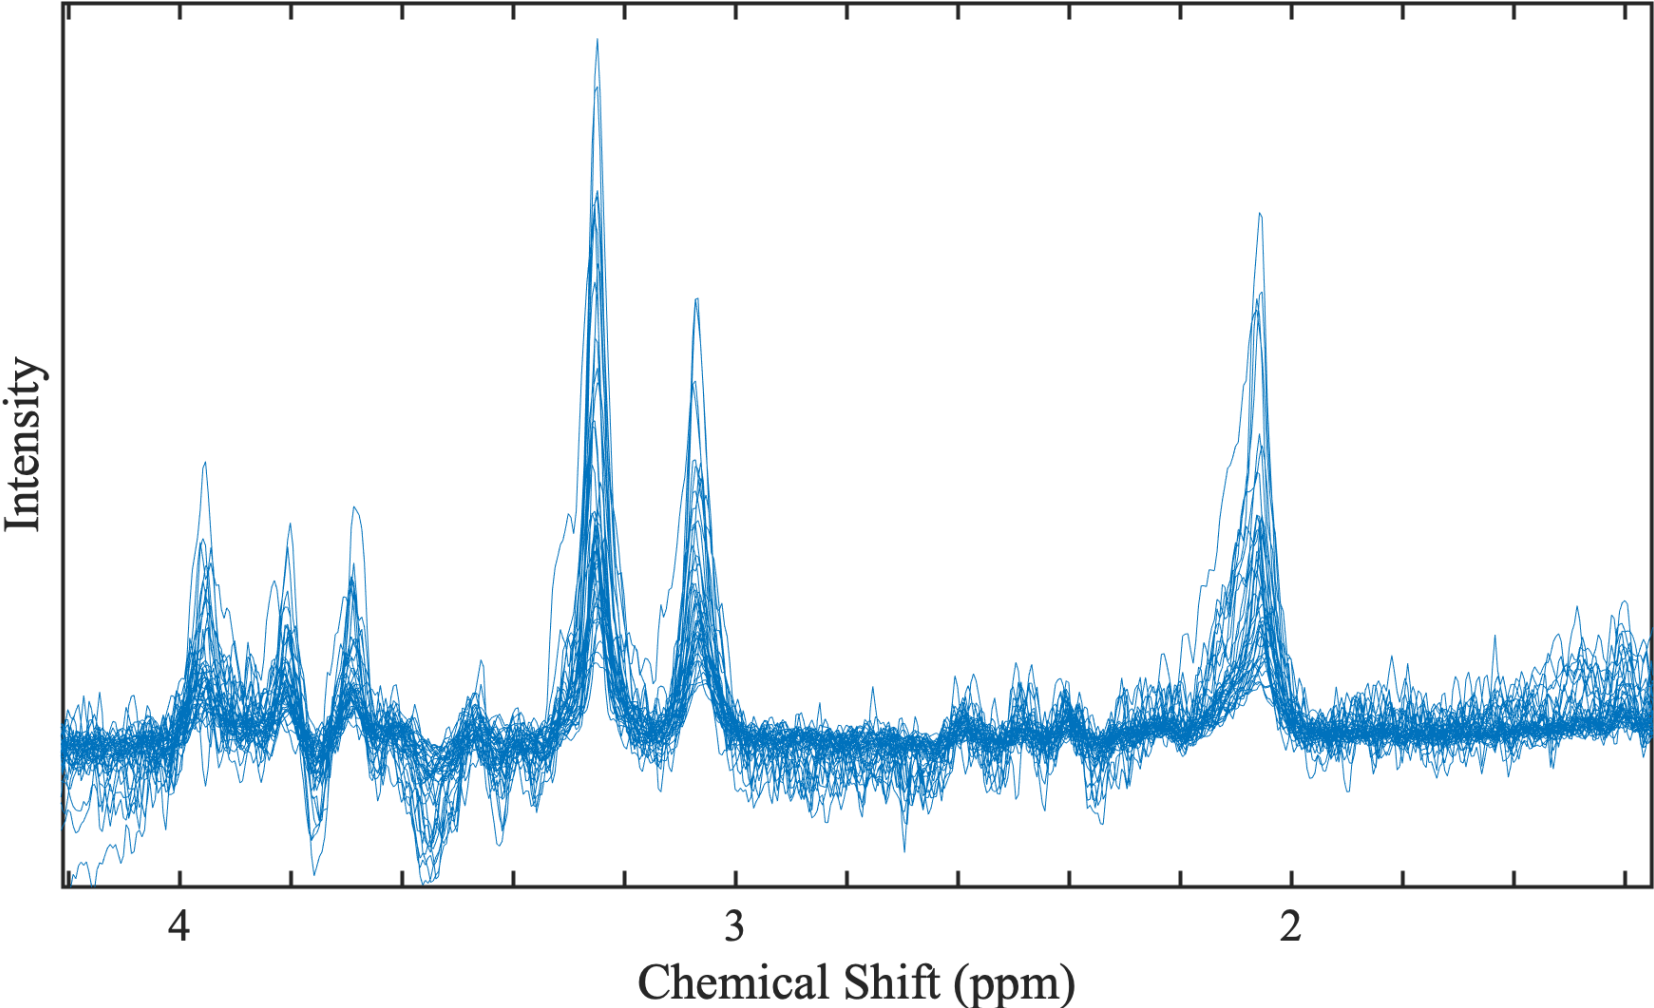

**Supplementary Figure B: Composite superimposed DIFF spectrum for all MEGA-PRESS acquisitions**

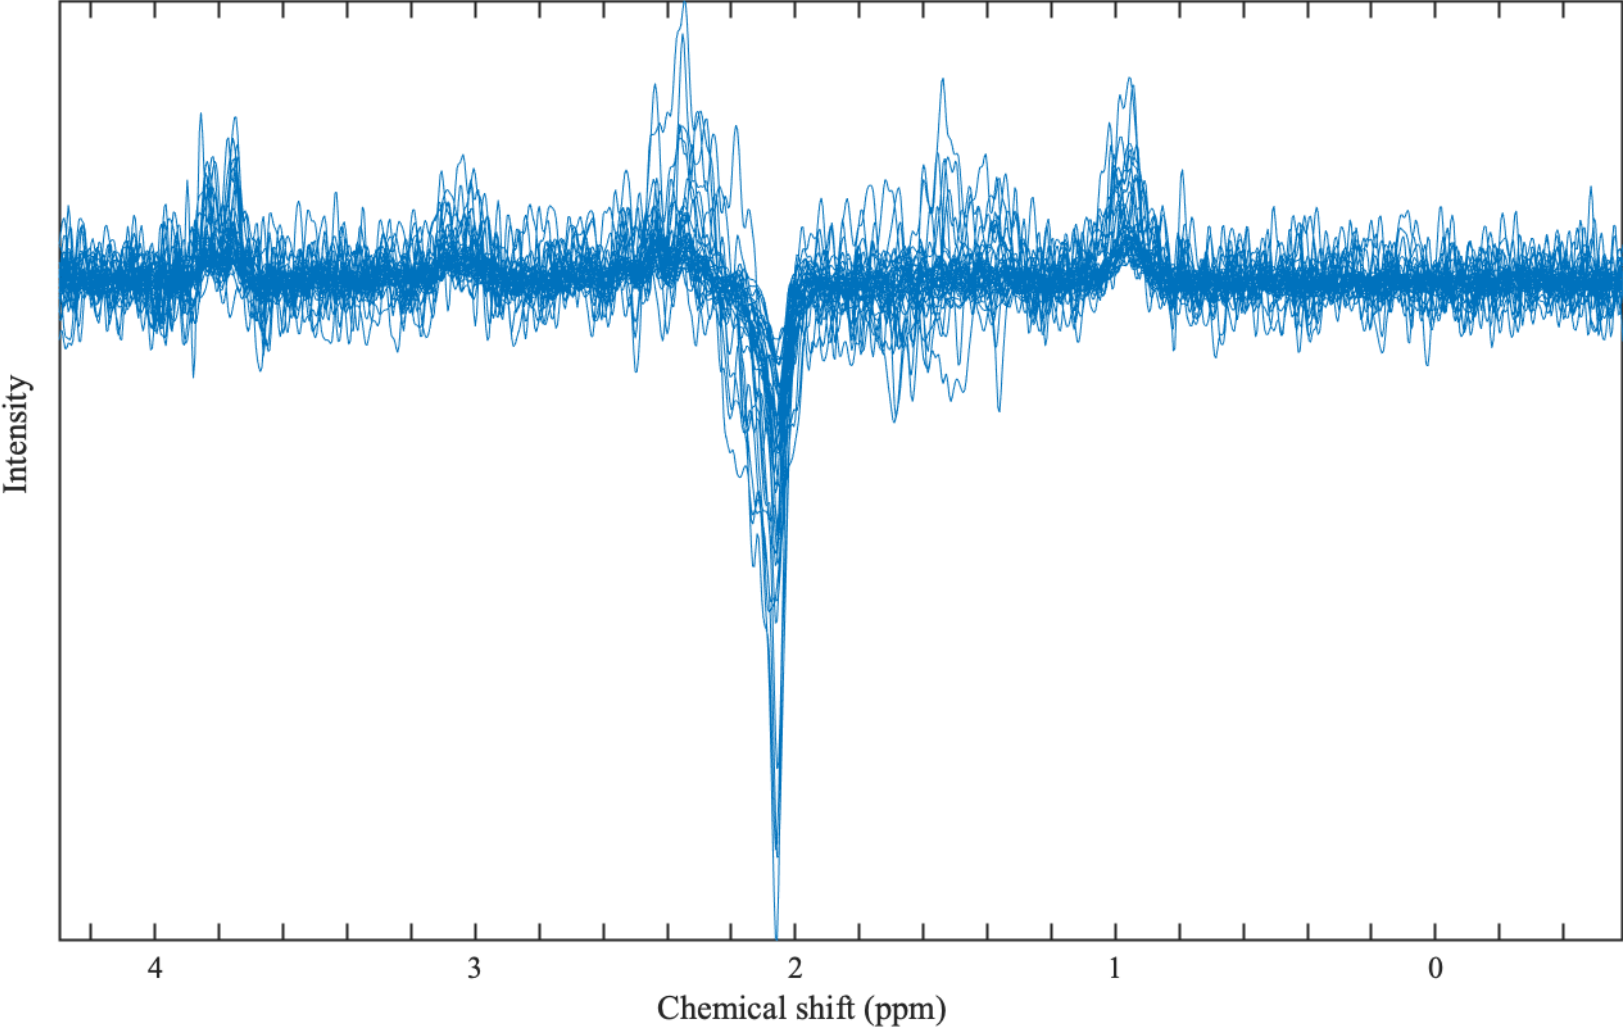

Supplementary Figure C: Metabolite profiles with advancing PMA at MRI: a) NAA, b) Cr and c) Cho

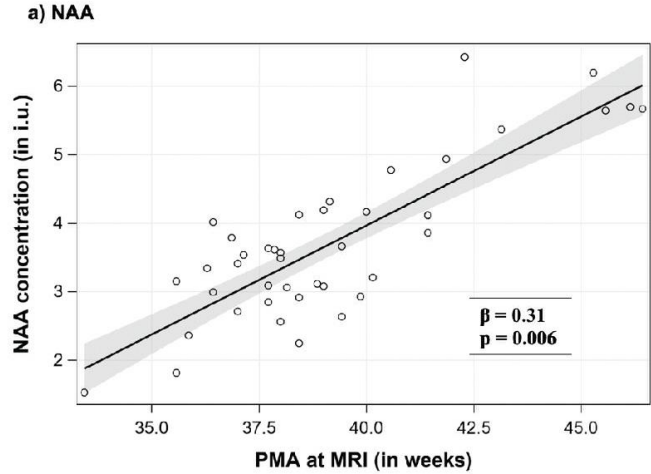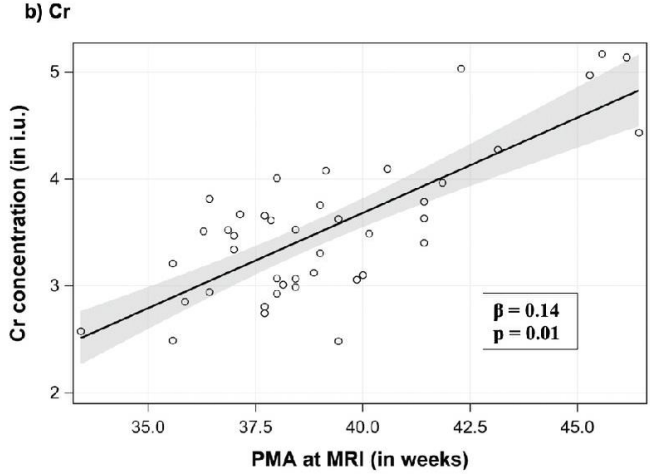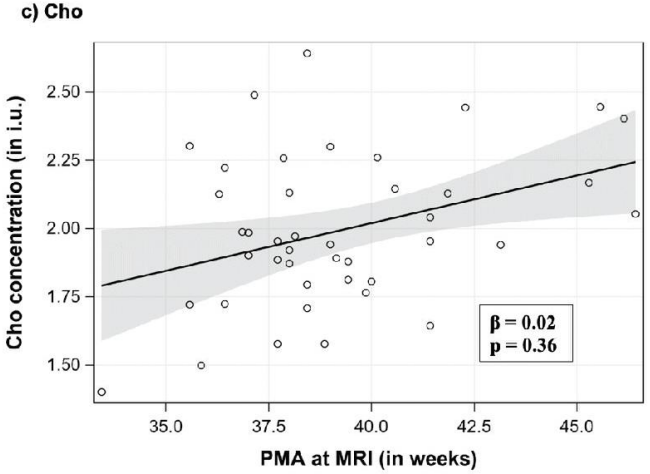

**Supplementary Table A. GABA, glutamate and Glx metabolite measurements with a range of Cramer-Rao Lower Bounds (CRLB) inclusion cut-off points**

| <b>Metabolites in mean <math>\pm</math> SE in institutional units, accounting for patient clustering; (CRLB inclusion cut-off %) (n = number of infants)</b> | <b>All infants</b>                    | <b>Male infants</b> | <b>Female infants</b> | <b>p-value</b> |
|--------------------------------------------------------------------------------------------------------------------------------------------------------------|---------------------------------------|---------------------|-----------------------|----------------|
| GABA (20%) (n = 31)                                                                                                                                          | 1.60 $\pm$ 0.06                       | 1.70 $\pm$ 0.07     | 1.47 $\pm$ 0.09       | 0.05           |
| GABA (40%, current) (n = 35)                                                                                                                                 | 1.50 $\pm$ 0.07                       | 1.66 $\pm$ 0.07     | 1.33 $\pm$ 0.11       | <b>0.01</b>    |
| GABA (100%) (n = 35)                                                                                                                                         | Same participants as current analysis |                     |                       |                |
| Glutamate DIFF (20%) (n = 29)                                                                                                                                | 2.82 $\pm$ 0.13                       | 2.86 $\pm$ 0.18     | 2.76 $\pm$ 0.18       | 0.69           |
| Glutamate DIFF (40%, current) (n = 33)                                                                                                                       | 2.64 $\pm$ 0.15                       | 2.82 $\pm$ 0.18     | 2.44 $\pm$ 0.23       | 0.20           |
| Glutamate DIFF (100%) (n = 35)                                                                                                                               | 2.54 $\pm$ 0.16                       | 2.82 $\pm$ 0.18     | 2.25 $\pm$ 0.24       | 0.06           |
| Glutamate OFF (20%) (n = 2)                                                                                                                                  | 4.42 $\pm$ 0.16                       | 4.26                | 4.58                  | --             |
| Glutamate OFF (40%, current) (n = 19)                                                                                                                        | 3.09 $\pm$ 0.20                       | 3.19 $\pm$ 0.24     | 2.92 $\pm$ 0.31       | 0.50           |
| Glutamate OFF (100%) (n = 34)                                                                                                                                | 2.61 $\pm$ 0.16                       | 2.67 $\pm$ 0.23     | 2.53 $\pm$ 0.19       | 0.62           |
| Glx DIFF (20%) (n = 33)                                                                                                                                      | 4.05 $\pm$ 0.26                       | 4.67 $\pm$ 0.38     | 3.32 $\pm$ 0.24       | <b>0.003</b>   |
| Glx DIFF (40%, current) (n = 36)                                                                                                                             | 3.84 $\pm$ 0.27                       | 4.54 $\pm$ 0.40     | 3.07 $\pm$ 0.26       | <b>0.002</b>   |
| Glx DIFF (100%) (n = 36)                                                                                                                                     | Same participants as current analysis |                     |                       |                |
| Glx OFF (20%) (n = 10)                                                                                                                                       | 5.58 $\pm$ 0.27                       | 4.66 $\pm$ 0.25     | 5.40 $\pm$ 0.61       | 0.70           |
| Glx OFF (40%, current) (n = 33)                                                                                                                              | 4.43 $\pm$ 0.19                       | 4.66 $\pm$ 0.24     | 4.18 $\pm$ 0.28       | 0.19           |
| Glx OFF (100%) (n = 38)                                                                                                                                      | 4.17 $\pm$ 0.20                       | 4.37 $\pm$ 0.27     | 3.96 $\pm$ 0.28       | 0.29           |
